# Supplementary material for: Plasma Calprotectin Levels Associate with Suspected Metabolic-Associated Fatty Liver Disease and All-Cause Mortality in the General Population
Source: MDPI journal article supplement (doi:10.3390/ijms232415708), 2022-12-11
Supplement: s1 [file s1]

## Supplementary Data

**Supplementary Table S1.** Baseline demographic, clinical and laboratory characteristics compared between 4,025 subjects with a hepatic steatosis index < 36 and 1,421 subjects with a HSI ≥ 36.

|                                    | HSI < 36         | HSI ≥ 36         | P-value |
|------------------------------------|------------------|------------------|---------|
|                                    | <i>n</i> = 4,025 | <i>n</i> = 1,421 |         |
| <b>Demographics</b>                |                  |                  |         |
| Age (years)                        | 50.7 [42.7-61.0] | 54.2 [46.1-63.0] | <0.001  |
| Sex                                |                  |                  | 0.394   |
| Male, <i>n</i> (%)                 | 1,962 (48.7)     | 674 (47.4)       |         |
| Female, <i>n</i> (%)               | 2,063 (51.3)     | 747 (52.6)       |         |
| Race                               |                  |                  | 0.017   |
| Caucasian, <i>n</i> (%)            | 3,847 (96.3)     | 1,349 (95.5)     |         |
| Negroid, <i>n</i> (%)              | 26 (0.7)         | 21 (1.5)         |         |
| Asian, <i>n</i> (%)                | 84 (2.1)         | 24 (1.7)         |         |
| Other, <i>n</i> (%)                | 39 (1.0)         | 18 (1.3)         |         |
| <b>Anthropometrics</b>             |                  |                  |         |
| BMI, kg/m <sup>2</sup>             | 24.8 [22.9-26.7] | 30.9 [28.9-33.4] | <0.001  |
| Waist circumference (cm)           | 87 [80-94]       | 102 [96-110]     | <0.001  |
| Waist/hip ratio                    | 0.88 [0.82-0.94] | 0.93 [0.87-0.99] | <0.001  |
| <b>Cardiovascular risk factors</b> |                  |                  |         |
| Current smokers, <i>n</i> (%)      | 1,187 (29.8)     | 312 (22.2)       | <0.001  |
| Alcohol consumption, <i>n</i> (%)  | 3,122 (78.2)     | 966 (68.5)       | <0.001  |
| None, <i>n</i> (%)                 | 871 (66.2)       | 445 (33.8)       |         |
| 1-4 drinks per month, <i>n</i> (%) | 660 (72.5)       | 250 (27.5)       |         |
| 2-7 drinks per week, <i>n</i> (%)  | 1,349 (77.4)     | 393 (22.6)       |         |
| 1-3 drinks per day, <i>n</i> (%)   | 948 (78.8)       | 255 (21.2)       |         |

|                                                 |                   |                   |        |
|-------------------------------------------------|-------------------|-------------------|--------|
| 4 or more drinks per day, <i>n</i> (%)          | 165 (70.8)        | 68 (29.2)         |        |
| SBP (mmHg)                                      | 119 [110-133]     | 131 [120-142]     | <0.001 |
| DBP (mmHg)                                      | 71 [66-78]        | 75 [69-82]        | <0.001 |
| Heart rate (bpm)                                | 67 [61-74]        | 69 [63-76]        | <0.001 |
| <b>Comorbidities</b>                            |                   |                   |        |
| History of cardiovascular disease, <i>n</i> (%) | 131 (3.3)         | 49 (3.4)          | 0.726  |
| History of diabetes, <i>n</i> (%)               | 45 (1.1)          | 84 (5.9)          | <0.001 |
| Metabolic syndrome, <i>n</i> (%)                | 1,340 (33.3)      | 788 (55.5)        | <0.001 |
| <b>Medication usage</b>                         |                   |                   |        |
| Antihypertensive medication, <i>n</i> (%)       | 558 (14.2)        | 359 (25.9)        | <0.001 |
| Lipid-lowering drugs, <i>n</i> (%)              | 239 (5.9)         | 145 (10.2)        | <0.001 |
| Oral antidiabetics, <i>n</i> (%)                | 25 (0.7)          | 44 (3.5)          | <0.001 |
| <b>Laboratory parameters</b>                    |                   |                   |        |
| Glucose (mmol/l)                                | 4.7 [4.4-5.1]     | 5.1 [4.6-5.6]     | <0.001 |
| Insulin (mU/l)                                  | 7.0 [5.2-9.6]     | 12.5 [9.0-18.1]   | <0.001 |
| HOMA-IR (mU x mmol/l <sup>2</sup> /22.5)        | 1.47 [1.05-2.11]  | 2.83 [1.94-4.23]  | <0.001 |
| UAE (mg/24h)                                    | 8.1 [5.8-13.4]    | 9.7 [6.6-18.5]    | <0.001 |
| hs-CRP (mg/l)                                   | 1.09 [0.52-2.48]  | 2.09 [1.08-4.14]  | <0.001 |
| eGFR (ml/min/1.73m <sup>2</sup> )               | 95.3 [83.3-105.5] | 91.8 [79.9-102.1] | <0.001 |
| Cystatin C (mg/dl)                              | 0.86 [0.77-0.97]  | 0.90 [0.82-1.00]  | <0.001 |
| AST (U/l)                                       | 22 [19-25]        | 24 [20-29]        | <0.001 |
| ALT (U/l)                                       | 15 [12-20]        | 25 [18-36]        | <0.001 |
| ALP (U/l)                                       | 64 [53-76]        | 70 [59-84]        | <0.001 |
| GGT (U/l)                                       | 21 [14-32]        | 33 [22-55]        | <0.001 |
| Total cholesterol (mmol/l)                      | 5.32 [4.69-6.06]  | 5.60 [4.93-6.31]  | <0.001 |

|                            |                  |                  |        |
|----------------------------|------------------|------------------|--------|
| LDL-cholesterol (mmol/l)   | 3.48 [2.91-4.12] | 3.71 [3.11-4.35] | <0.001 |
| HDL-cholesterol (mmol/l)   | 1.27 [1.08-1.49] | 1.12 [0.96-1.32] | <0.001 |
| Triglycerides (mmol/l)     | 1.01 [0.75-1.41] | 1.40 [1.02-1.96] | <0.001 |
| Plasma calprotectin (mg/l) | 0.47 [0.34-0.67] | 0.56 [0.40-0.77] | <0.001 |

Abbreviations: ALT, alanine aminotransferase; AST, aspartate aminotransferase; BMI, body-mass index; CHF, chronic heart failure; CKD, chronic kidney disease; CVD, cardiovascular disease; DBP, diastolic blood pressure; eGFR, estimated glomerular filtration rate; GGT, gamma-glutamyltransferase; HDL, high-density lipoprotein; HOMA-IR, Homeostatic Model Assessment for Insulin Resistance; hs-CRP, high-sensitive C-reactive protein; HSI, hepatic steatosis index; LDL, low-density lipoprotein; SBP, systolic blood pressure; UAE, urinary albumin excretion.

**Supplementary Table S2.** Baseline demographic, clinical and laboratory characteristics, stratified by tertiles of plasma calprotectin levels.

|                                    | <b>Tertile 1</b> | <b>Tertile 2</b> | <b>Tertile 3</b> | <b>P-value</b> |
|------------------------------------|------------------|------------------|------------------|----------------|
| Calprotectin                       | <0.41 mg/l       | 0.41-0.61 mg/l   | >0,61 mg/l       |                |
| <b>Demographics</b>                |                  |                  |                  |                |
| Age (years)                        | 50.1 [42.1-59.5] | 51.6 [43.6-61.0] | 54.2 [44.9-64.7] | <0.001         |
| Sex                                |                  |                  |                  | <0.001         |
| <i>Male, n (%)</i>                 | 784 (42.4)       | 882 (49.4)       | 970 (53.5)       |                |
| <i>Female, n (%)</i>               | 1,064 (57.6)     | 902 (50.6)       | 844 (46.5)       |                |
| Ethnicity                          |                  |                  |                  | 0.051          |
| <i>White, n (%)</i>                | 1,737 (95.0)     | 1,714 (96.6)     | 1,745 (96.6)     |                |
| <i>Black, n (%)</i>                | 15 (0.8)         | 15 (0.8)         | 17 (0.9)         |                |
| <i>Asian, n (%)</i>                | 51 (2.8)         | 31 (1.7)         | 26 (1.4)         |                |
| <i>Other, n (%)</i>                | 25 (1.4)         | 25 (1.4)         | 18 (1.0)         |                |
| <b>Anthropometrics</b>             |                  |                  |                  |                |
| BMI, kg/m <sup>2</sup>             | 25.0 [22.8-27.9] | 26.2 [23.8-28.9] | 26.8 [24.4-29.7] | <0.001         |
| Waist circumference (cm)           | 87 [78-96]       | 92 [83-100]      | 94 [86-102]      | <0.001         |
| Waist/hip ratio                    | 0.87 [0.81-0.94] | 0.90 [0.84-0.96] | 0.91 [0.85-0.97] | <0.001         |
| <b>Cardiovascular risk factors</b> |                  |                  |                  |                |
| Current smokers, <i>n (%)</i>      | 374 (20.5)       | 460 (26.0)       | 665 (37.0)       | <0.001         |
| Alcohol consumption, <i>n (%)</i>  | 1,417 (77.5)     | 1,366 (77.1)     | 1,305 (72.3)     | <0.001         |
| <i>None, n (%)</i>                 | 412 (31.3)       | 405 (30.8)       | 499 (37.9)       |                |
| <i>1-4 drinks per month, n (%)</i> | 314 (34.5)       | 305 (33.5)       | 291 (32.0)       |                |
| <i>2-7 drinks per week, n (%)</i>  | 603 (34.6)       | 595 (34.2)       | 544 (31.2)       |                |
| <i>1-3 drinks per day, n (%)</i>   | 437 (36.3)       | 392 (32.6)       | 374 (31.1)       |                |

|                                                 |                   |                   |                   |        |
|-------------------------------------------------|-------------------|-------------------|-------------------|--------|
| 4 or more drinks per day, <i>n</i> (%)          | 63 (27.0)         | 74 (31.8)         | 96 (41.2)         |        |
| SBP (mmHg)                                      | 118 [109-131]     | 123 [113-136]     | 127 [115-140]     | <0.001 |
| DBP (mmHg)                                      | 71 [65-77]        | 73 [67-79]        | 74 [68-81]        | <0.001 |
| Heart rate (bpm)                                | 66 [60-72]        | 68 [62-75]        | 70 [63-77]        | <0.001 |
| <b>Comorbidities</b>                            |                   |                   |                   |        |
| History of cardiovascular disease, <i>n</i> (%) | 38 (2.1)          | 64 (3.6)          | 78 (4.3)          | <0.001 |
| History of diabetes, <i>n</i> (%)               | 29 (1.6)          | 39 (2.2)          | 61 (3.4)          | 0.001  |
| Metabolic syndrome, <i>n</i> (%)                | 569 (30.8)        | 699 (39.2)        | 860 (47.4)        | <0.001 |
| <b>Medication usage</b>                         |                   |                   |                   |        |
| Antihypertensive medication, <i>n</i> (%)       | 242 (13.4)        | 277 (15.9)        | 398 (22.5)        | <0.001 |
| Lipid-lowering drugs, <i>n</i> (%)              | 95 (5.1)          | 131 (7.3)         | 158 (8.7)         | <0.001 |
| Oral glucose-lowering drugs, <i>n</i> (%)       | 16 (1.0)          | 21 (1.4)          | 32 (2.0)          | 0.057  |
| <b>Laboratory parameters</b>                    |                   |                   |                   |        |
| Glucose (mmol/l)                                | 4.7 [4.4-5.1]     | 4.7 [4.4-5.2]     | 4.8 [4.5-5.3]     | <0.001 |
| Insulin (mU/l)                                  | 7.0 [5.1-10.2]    | 8.2 [6.0-11.9]    | 9.1 [6.4-13.0]    | <0.001 |
| HOMA-IR (mU x mmol/l <sup>2</sup> /22.5)        | 1.45 [1.03-2.22]  | 1.75 [1.22-2.65]  | 1.96 [1.32-2.99]  | <0.001 |
| UAE (mg/24h)                                    | 7.6 [5.8-11.6]    | 8.5 [6.0-14.8]    | 9.6 [6.4-19.0]    | <0.001 |
| hs-CRP (mg/l)                                   | 0.81 [0.37-1.59]  | 1.24 [0.66-2.61]  | 2.41 [1.16-4.93]  | <0.001 |
| eGFR (ml/min/1.73m <sup>2</sup> )               | 97.0 [85.3-106.8] | 94.4 [83.1-104.7] | 92.0 [78.2-102.1] | <0.001 |
| Cystatin C (mg/dl)                              | 0.84 [0.76-0.94]  | 0.87 [0.79-0.97]  | 0.91 [0.81-1.03]  | <0.001 |
| AST (U/l)                                       | 22 [19-26]        | 22 [19-27]        | 23 [20-27]        | <0.001 |
| ALT (U/l)                                       | 16 [12-22]        | 17 [13-25]        | 18 [13-24]        | <0.001 |
| ALP (U/l)                                       | 60 [50-73]        | 66 [55-78]        | 71 [61-85]        | <0.001 |
| GGT (U/l)                                       | 20 [13-31]        | 24 [16-38]        | 26 [18-42]        | <0.001 |

|                            |                  |                  |                  |        |
|----------------------------|------------------|------------------|------------------|--------|
| Total cholesterol (mmol/l) | 5.26 [4.61-6.00] | 5.36 [4.75-6.16] | 5.51 [4.85-6.22] | <0.001 |
| LDL-cholesterol (mmol/l)   | 3.41 [2.84-4.04] | 3.55 [2.98-4.21] | 3.65 [2.09-4.30] | <0.001 |
| HDL-cholesterol (mmol/l)   | 1.32 [1.11-1.53] | 1.22 [1.04-1.42] | 1.16 [1.00-1.37] | <0.001 |
| Triglycerides (mmol/l)     | 0.96 [0.70-1.37] | 1.10 [0.81-1.57] | 1.25 [0.90-1.76] | <0.001 |
| Fatty liver index          | 22.8 [9.0-52.0]  | 37.6 [16.3-65.6] | 47.5 [23.1-74.1] | <0.001 |

Abbreviations: ALT, alanine aminotransferase; AST, aspartate aminotransferase; BMI, body-mass index; CHF, chronic heart failure; CKD, chronic kidney disease; CVD, cardiovascular disease; DBP, diastolic blood pressure; eGFR, estimated glomerular filtration rate; GGT, gamma-glutamyltransferase; HDL, high-density lipoprotein; HOMA-IR, Homeostatic Model Assessment for Insulin Resistance; hs-CRP, high-sensitive C-reactive protein; LDL, low-density lipoprotein; SBP, systolic blood pressure; UAE, urinary albumin excretion.

**Supplementary Table S3.** Univariable and multivariable logistic regression analyses investigating the association between the HSI and plasma calprotectin levels (<sup>2</sup>log-transformed).

|                             | Model 1          |         | Model 2          |         | Model 3          |         | Model 4          |         |
|-----------------------------|------------------|---------|------------------|---------|------------------|---------|------------------|---------|
|                             | OR (95% CI)      | P-value |
| Plasma calprotectin (2-log) | 1.47 (1.35-1.59) | <0.001  | 1.45 (1.34-1.57) | <0.001  | 1.43 (1.32-1.56) | <0.001  | 1.24 (1.12-1.38) | <0.001  |
| Age                         |                  |         | 1.01 (1.01-1.02) | <0.001  | 0.99 (0.99-1.00) | 0.046   | 0.99 (0.98-0.99) | <0.001  |
| Sex (ref=male)              |                  |         | 1.14 (1.01-1.29) | 0.039   | 1.10 (0.97-1.26) | 0.143   | 1.28 (1.10-1.49) | 0.001   |
| Diabetes (ref=no)           |                  |         |                  |         | 4.65 (3.14-6.89) | <0.001  | 1.64 (0.97-2.79) | 0.066   |
| History of CVD (ref=no)     |                  |         |                  |         | 0.68 (0.48-0.98) | 0.039   | 0.59 (0.38-0.92) | 0.019   |
| Hypertension (ref=no)       |                  |         |                  |         | 2.22 (1.91-2.58) | <0.001  | 1.61 (1.35-1.91) | <0.001  |
| Current smoking (ref=no)    |                  |         |                  |         | 0.63 (0.54-0.73) | <0.001  | 0.64 (0.54-0.76) | <0.001  |
| Alcohol use (ref=no)        |                  |         |                  |         | 0.68 (0.59-0.78) | <0.001  | 0.76 (0.64-0.89) | 0.001   |
| Total cholesterol           |                  |         |                  |         |                  |         | 1.15 (1.07-1.23) | <0.001  |

|         |  |  |  |  |  |  |                  |        |
|---------|--|--|--|--|--|--|------------------|--------|
| eGFR    |  |  |  |  |  |  | 1.00 (0.99-1.01) | 0.899  |
| HOMA-IR |  |  |  |  |  |  | 1.76 (1.66-1.86) | <0.001 |
| hs-CRP  |  |  |  |  |  |  | 1.02 (1.00-1.03) | 0.048  |

Abbreviations: CI, confidence interval; CRP, C-reactive protein; CVD, cardiovascular disease; eGFR, estimated glomerular filtration rate; HOMA-IR, Homeostatic Model Assessment for Insulin Resistance; OR, odds ratio.



**Supplementary Table S4.** Stratified analyses for the association between plasma calprotectin levels (<sup>2</sup>log-transformed) and suspected MAFLD (FLI ≥60) across various subgroups.

| Variable               | Total (n) | OR   | 95% CI    | P-value for interaction |
|------------------------|-----------|------|-----------|-------------------------|
| <b>Overall</b>         | 5446      | 1.19 | 1.06-1.33 |                         |
| <b>Gender</b>          |           |      |           |                         |
| Male                   | 2636      | 1.20 | 1.03-1.39 | 0.462                   |
| Female                 | 2810      | 1.19 | 1.00-1.43 |                         |
| <b>BMI</b>             |           |      |           |                         |
| < 25 kg/m <sup>2</sup> | 2177      | 1.32 | 0.86-2.04 | <0.001                  |
| ≥ 25 kg/m <sup>2</sup> | 3257      | 1.14 | 1.01-1.30 |                         |
| <b>Hypertension</b>    |           |      |           |                         |
| No                     | 3797      | 1.24 | 1.07-1.44 | 0.006                   |
| Yes                    | 1646      | 1.09 | 0.91-1.31 |                         |
| <b>History of CVD</b>  |           |      |           |                         |
| No                     | 5266      | 1.19 | 1.06-1.34 | 0.699                   |
| Yes                    | 180       | 1.56 | 0.75-3.25 |                         |
| <b>Diabetes</b>        |           |      |           |                         |
| No                     | 5305      | 1.18 | 1.05-1.32 | 0.732                   |
| Yes                    | 129       | 0.82 | 0.35-1.93 |                         |

|                            |      |      |           |       |
|----------------------------|------|------|-----------|-------|
| <b>UAE</b>                 |      |      |           |       |
| < 8.4 mg/24-h              | 2723 | 1.22 | 1.02-1.45 | 0.999 |
| > 8.4 mg/24-h              | 2723 | 1.13 | 0.97-1.32 |       |
| <b>Alcohol consumption</b> |      |      |           |       |
| No                         | 1316 | 1.15 | 0.92-1.43 | 0.464 |
| Yes                        | 4088 | 1.21 | 1.06-1.38 |       |
| <b>Current smoking</b>     |      |      |           |       |
| No                         | 3886 | 1.23 | 1.07-1.40 | 0.164 |
| Yes                        | 1499 | 1.06 | 0.85-1.32 |       |
| <b>Total cholesterol</b>   |      |      |           |       |
| < 5.38 mmol/l              | 2723 | 1.31 | 1.10-1.56 | 0.368 |
| > 5.38 mmol/l              | 2723 | 1.09 | 0.93-1.26 |       |

Abbreviations: BMI, body-mass index; CI, confidence interval; CVD, cardiovascular disease; OR, odds ratio; UAE, urinary albumin excretion.

**Supplementary Table S5.** Stratified analyses for the association between plasma calprotectin levels (<sup>2</sup>log-transformed) and suspected MAFLD (HSI ≥36) across various subgroups.

| <b>Variable</b> | <b>Total (n)</b> | <b>OR</b> | <b>95% CI</b> | <b>P-value for interaction</b> |
|-----------------|------------------|-----------|---------------|--------------------------------|
| <b>Overall</b>  | 5446             | 1.24      | 1.12-1.38     |                                |
| <b>Gender</b>   |                  |           |               |                                |
| Male            | 2636             | 1.16      | 0.99-1.35     | <b>0.013</b>                   |

|                            |      |      |           |                  |
|----------------------------|------|------|-----------|------------------|
| Female                     | 2810 | 1.28 | 1.10-1.48 |                  |
| <b>BMI</b>                 |      |      |           |                  |
| < 25 kg/m <sup>2</sup>     | 2177 | 1.43 | 0.82-2.50 | <b>&lt;0.001</b> |
| ≥ 25 kg/m <sup>2</sup>     | 3257 | 1.15 | 1.02-1.29 |                  |
| <b>Hypertension</b>        |      |      |           |                  |
| No                         | 3797 | 1.25 | 1.10-1.43 | <b>0.030</b>     |
| Yes                        | 1646 | 1.18 | 0.99-1.41 |                  |
| <b>History of CVD</b>      |      |      |           |                  |
| No                         | 5266 | 1.24 | 1.12-1.38 | 0.277            |
| Yes                        | 180  | 1.19 | 0.60-2.39 |                  |
| <b>Diabetes</b>            |      |      |           |                  |
| No                         | 5305 | 1.22 | 1.09-1.36 | 0.297            |
| Yes                        | 129  | 1.39 | 0.62-3.08 |                  |
| <b>UAE</b>                 |      |      |           |                  |
| < 8.4 mg/24-h              | 2723 | 1.32 | 1.13-1.54 | 0.993            |
| > 8.4 mg/24-h              | 2723 | 1.18 | 1.02-1.36 |                  |
| <b>Alcohol consumption</b> |      |      |           |                  |
| No                         | 1316 | 1.24 | 1.01-1.52 | 0.685            |

|                          |      |      |           |       |
|--------------------------|------|------|-----------|-------|
| Yes                      | 4088 | 1.24 | 1.10-1.40 |       |
| <b>Current smoking</b>   |      |      |           |       |
| No                       | 3886 | 1.23 | 1.09-1.39 | 0.272 |
| Yes                      | 1499 | 1.24 | 0.99-1.55 |       |
| <b>Total cholesterol</b> |      |      |           |       |
| < 5.38 mmol/l            | 2723 | 1.32 | 1.13-1.54 | 0.089 |
| > 5.38 mmol/l            | 2723 | 1.16 | 1.00-1.34 |       |

Abbreviations: BMI, body-mass index; CI, confidence interval; CVD, cardiovascular disease; OR, odds ratio; UAE, urinary albumin excretion.

**Supplementary Table S6.** Cox proportional hazards regression analyses for associations between plasma calprotectin levels and the risk of all-cause mortality in subjects with HSI<36 (A) and HSI ≥36 (B).

|                                  | HR per doubling                     | T1               | T2                        | T3                                  |
|----------------------------------|-------------------------------------|------------------|---------------------------|-------------------------------------|
|                                  |                                     | <0.41 mg/l       | 0.41-0.61 mg/l            | >0,61 mg/l                          |
| <b>A. HSI &lt;36 (n = 4,025)</b> |                                     |                  |                           |                                     |
| Model 1                          | 1.57 (1.33-1.85), <b>P&lt;0.001</b> | 1.00 (reference) | 1.13 (0.78-1.62), P=0.520 | 1.91 (1.37-2.65), <b>P&lt;0.001</b> |
| Model 2                          | 1.31 (1.10-1.57), <b>P=0.003</b>    | 1.00 (reference) | 0.91 (0.63-1.31), P=0.614 | 1.21 (0.87-1.69), P=0.255           |
| Model 3                          | 1.20 (1.00-1.44), P=0.054           | 1.00 (reference) | 0.83 (0.58-1.20), P=0.322 | 1.05 (0.75-1.47), P=0.794           |
| Model 4                          | 1.18 (0.95-1.47), P=0.143           | 1.00 (reference) | 0.80 (0.54-1.18), P=0.263 | 0.95 (0.65-1.38), P=0.771           |
| <b>B. HSI ≥36 (n = 1,421)</b>    |                                     |                  |                           |                                     |

|         |                                   |                  |                                   |                                   |
|---------|-----------------------------------|------------------|-----------------------------------|-----------------------------------|
| Model 1 | 1.23 (0.89-1.69), <i>P</i> =0.215 | 1.00 (reference) | 1.65 (0.85-3.19), <i>P</i> =0.139 | 1.42 (0.74-2.72), <i>P</i> =0.298 |
| Model 2 | 1.21 (0.88-1.67), <i>P</i> =0.234 | 1.00 (reference) | 1.91 (0.98-3.70), <i>P</i> =0.057 | 1.47 (0.76-2.83), <i>P</i> =0.248 |
| Model 3 | 1.15 (0.83-1.59), <i>P</i> =0.408 | 1.00 (reference) | 1.92 (0.98-3.73), <i>P</i> =0.056 | 1.38 (0.71-2.67), <i>P</i> =0.346 |
| Model 4 | 0.89 (0.60-1.33), <i>P</i> =0.569 | 1.00 (reference) | 1.44 (0.71-2.93), <i>P</i> =0.315 | 0.78 (0.37-1.65), <i>P</i> =0.522 |

Model 1, crude model. Model 2, model 1 + with adjustment for age and sex. Model 3, model 2 with adjustment for current smoking, alcohol consumption, history of cardiovascular diseases, history of diabetes, and hypertension. Model 4, model 3 with additional adjustment for high-sensitive C-reactive protein (hs-CRP), insulin resistance (HOMA-IR), estimated glomerular filtration rate (eGFR), and total cholesterol levels. **Bold** *P*-values indicate statistical significance. Abbreviations: HSI, hepatic steatosis index; HR, hazard ratio.
